# Supplementary material
Source: PubMed Central journal article supplement (PMC4697363)
Supplement: NIHMS65959-supplement-Supplementary_Table_1.pdf [file NIHMS65959-supplement-Supplementary_Table_1.pdf]

| Current state |          |         | Action        | Additional condition                  | Reward | New state   |         |
|---------------|----------|---------|---------------|---------------------------------------|--------|-------------|---------|
| Position      | Sound    | Enviro. |               |                                       |        | Sound       | Enviro. |
| N             | -        | -       | -             | 5s passed since reward consumed       | 0      | L or R or N | -       |
| L (or R)      | L (or R) | -       | P             | lever pressed before within the trial | 0      | -           | Pellet  |
| L (or R)      | R (or L) | -       | P             |                                       | 0      | -           | Light   |
| N             | N        | -       | -             | animal for 1.5s in the nose poke hole | 0      | -           | Pellet  |
| N             | N        | -       | L (or R or F) |                                       | 0      | -           | Light   |
| Any           | -        | Pellet  | F             |                                       | 1      | -           | -       |
| Any           | -        | Light   | Any           | 5s passed since light turned on       | 0      | -           | -       |

**Supplementary Table 1. State transitions in the simulations of the actor-critic model.**
